# Supplementary material
Source: PubMed Central journal article supplement (PMC2857071)
Supplement: supp_M110.109744_jbc.M110.109744-1.pdf [file supp_M110.109744_jbc.M110.109744-1.pdf]

## Supplemental Figure 1

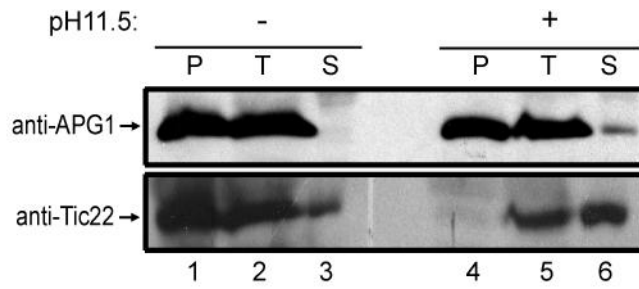

**Supplemental Figure 1.** Controls for alkaline extraction of peripheral membrane proteins from the IEM. Isolated chloroplasts were lysed in the presence (+) or absence (-) of 0.2M Na<sub>2</sub>CO<sub>3</sub>, pH 11.5 and the total fraction (T) was separated into a membrane pellet (P) and soluble supernatant (S) by differential centrifugation. The samples were resolved by SDS-PAGE and immunoblotted with antisera specific for APG1 or Tic22.
