# Supplementary material
Source: PubMed Central journal article supplement (PMC2857071)
Supplement: supp_M110.109744_jbc.M110.109744-2.pdf [file supp_M110.109744_jbc.M110.109744-2.pdf]

## Supplemental Figure 2

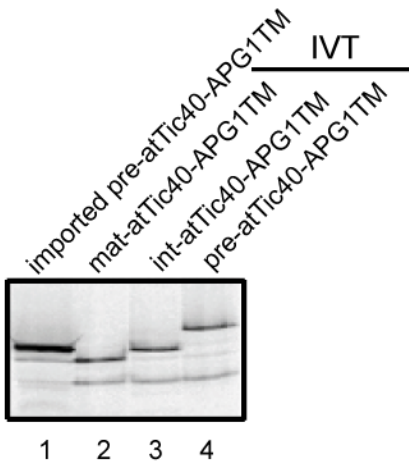

**Supplemental Figure 2.** Comparison of the mobility of in vitro translated [ $^{35}\text{S}$ ]pre-atTic40-APG1TM, [ $^{35}\text{S}$ ]int-atTic40-APG1TM, and [ $^{35}\text{S}$ ]atTic40-APG1TM with that of the product generated by importing [ $^{35}\text{S}$ ]pre-atTic40-APG1TM into isolated chloroplasts. The mobility of in vitro translated [ $^{35}\text{S}$ ]int-atTic40-APG1TM is similar to the int-atTic40-APG1TM import product.
